# Supplementary material for: Electrophysiological, Morphologic, and Transcriptomic Profiling of the Ogura-CMS, DGMS and Maintainer Broccoli Lines
Source: MDPI journal article supplement (doi:10.3390/plants11040561), 2022-02-21

Figure S1: Correlation analysis of gene expression levels between replicate samples of broccoli.

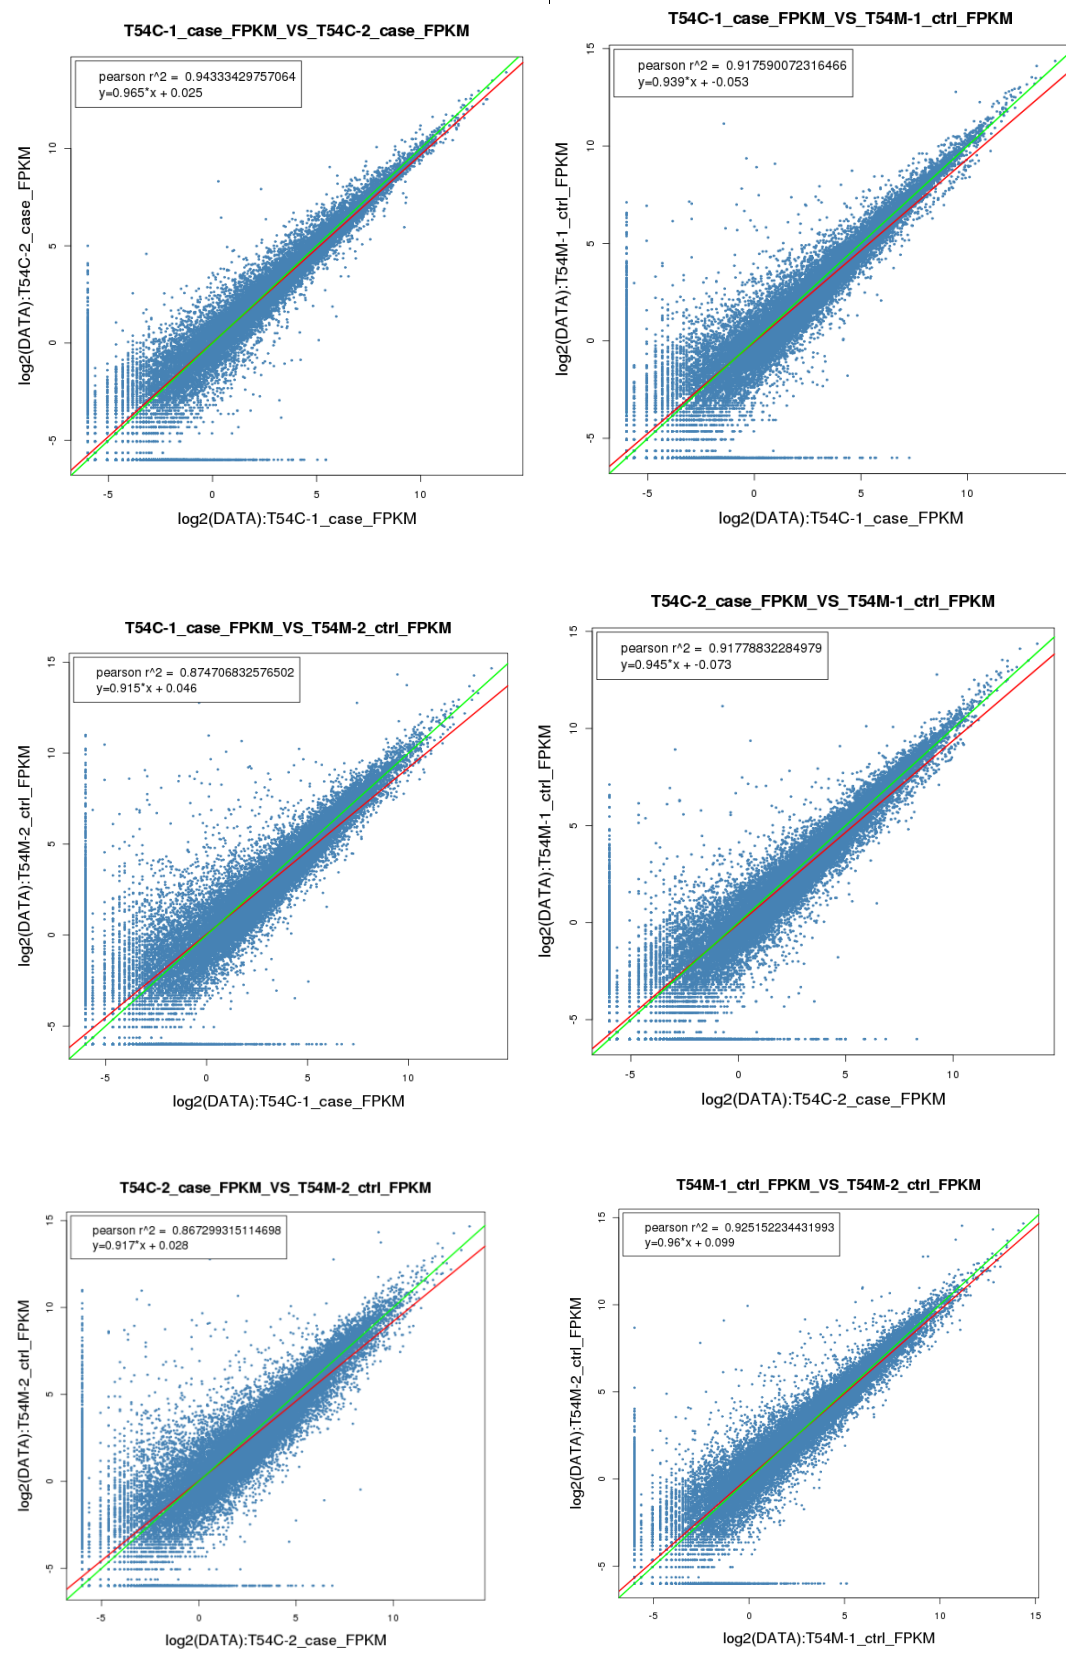

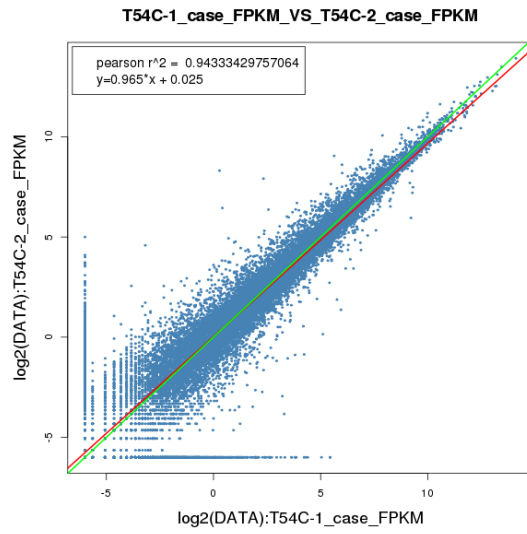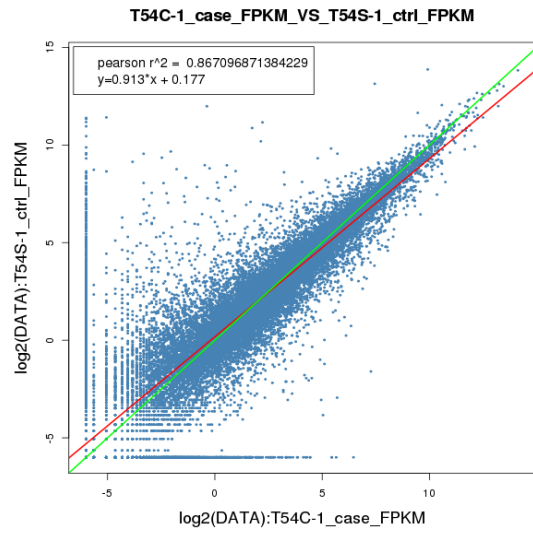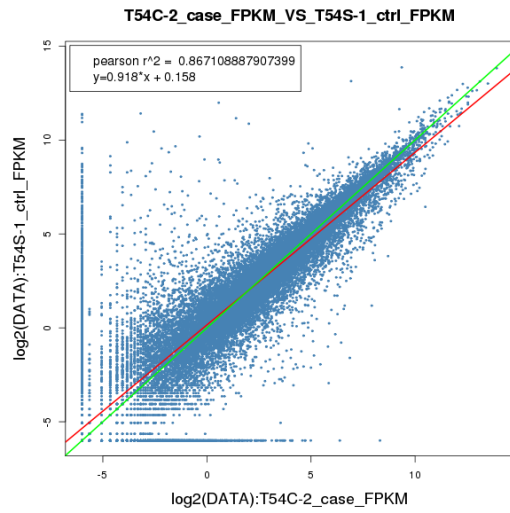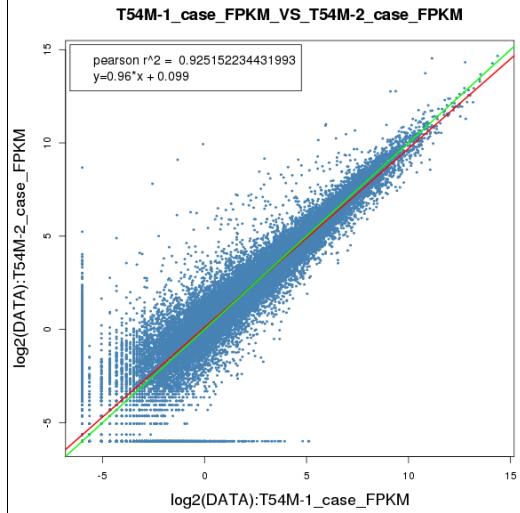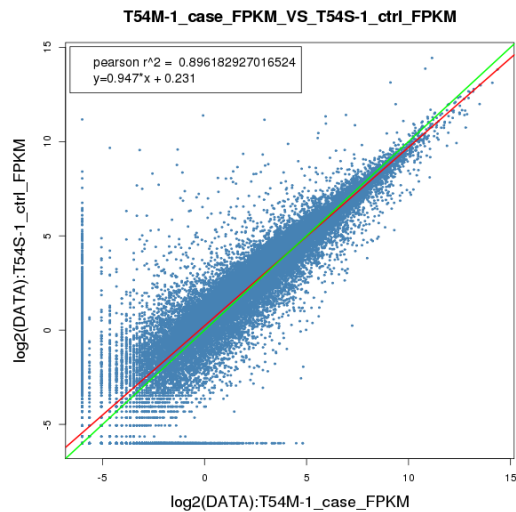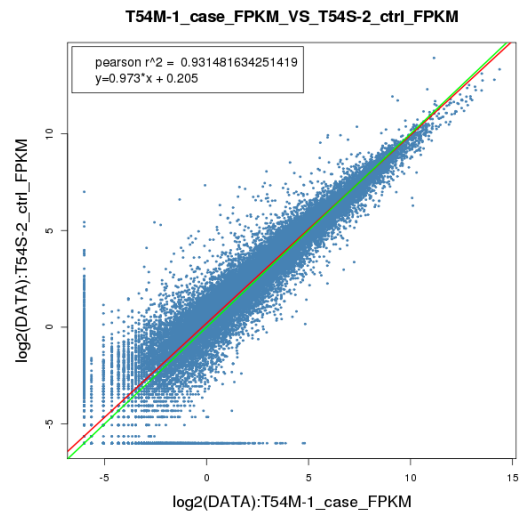

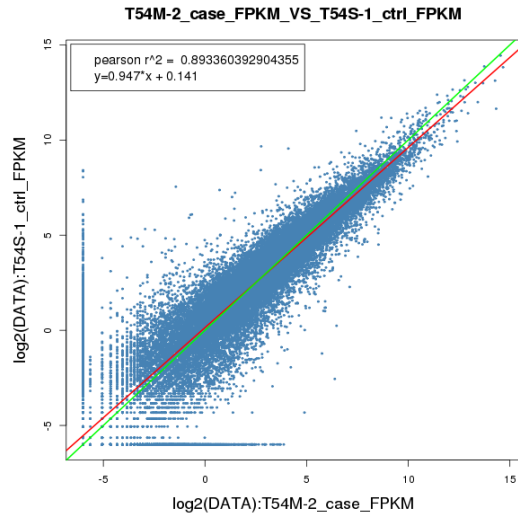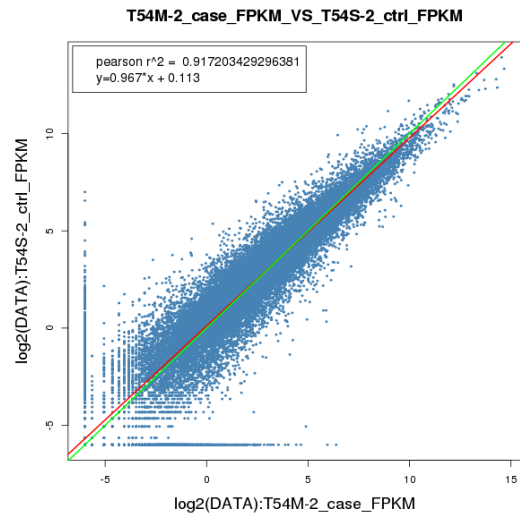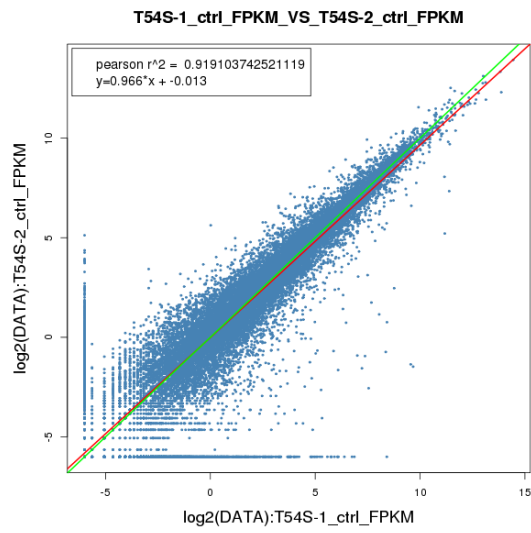

Supplement: s1 [file s1]
