# Supplementary material for: Electrophysiological, Morphologic, and Transcriptomic Profiling of the Ogura-CMS, DGMS and Maintainer Broccoli Lines
Source: MDPI journal article supplement (doi:10.3390/plants11040561), 2022-02-21
Supplement: s1 [file s1]

**Table S1.** Summary of the transcriptome sequencing data.

| <b>Sample</b> | <b>Clean</b> | <b>Clean</b>      | <b>Clean</b> | <b>Clean</b>  | <b>Clean</b> | <b>Clean</b> | <b>Mapped Reads</b>   |
|---------------|--------------|-------------------|--------------|---------------|--------------|--------------|-----------------------|
| <b>Name</b>   | <b>Reads</b> | <b>Bases (Gb)</b> | <b>N (%)</b> | <b>GC (%)</b> | <b>Q20</b>   | <b>Q30</b>   | <b>(Mapped/Clean)</b> |
|               |              |                   |              |               | <b>(%)</b>   | <b>(%)</b>   |                       |
| <b>T54C-1</b> | 30962081     | 9.29              | 0.00         | 46.74         | 98.34        | 95.47        | 72.70%                |
| <b>T54C-2</b> | 27469179     | 8.24              | 0.00         | 46.80         | 98.2         | 95.11        | 72.30%                |
| <b>T54M-1</b> | 28243036     | 8.47              | 0.00         | 46.56         | 98.34        | 95.48        | 73.00%                |
| <b>T54M-2</b> | 24472981     | 7.34              | 0.00         | 45.08         | 98.12        | 95.06        | 71.60%                |
| <b>T54S-1</b> | 25153030     | 7.55              | 0.00         | 46.27         | 98.33        | 95.43        | 72.60%                |
| <b>T54S-2</b> | 23124261     | 6.94              | 0.00         | 46.63         | 98.41        | 95.62        | 72.90%                |

Note: T54C, T54M and T54S represented the samples of the Ogura-CMS, DGMS and maintainer lines, respectively.

**Table S2.** The KEGG pathways enriched for the DEGs.

| Term                              | Sample       | ID      | Input No | Background No | <i>p</i> -Value | Corrected <i>p</i> -Value | Up/Down |
|-----------------------------------|--------------|---------|----------|---------------|-----------------|---------------------------|---------|
| Photosynthesis -antenna proteins  | T54M vs T54S | ko00196 | 7        | 35            | 0.00000         | 0.00004                   | up      |
| Plant hormone signal transduction | T54M vs T54S | ko04075 | 15       | 548           | 0.00185         | 0.05459                   | up      |
|                                   | T54C vs T54S | ko04075 | 26       | 548           | 0.00000         | 0.00009                   | up      |
| Phenylpropanoid biosynthesis      | T54M vs T54S | ko00940 | 14       | 272           | 0.00025         | 0.02413                   | down    |
|                                   | T54C vs T54S | ko00940 | 25       | 272           | 0.00000         | 0.00019                   | down    |
| ABC transporters                  | T54M vs T54S | ko02010 | 5        | 33            | 0.00036         | 0.02413                   | down    |
|                                   | T54C vs 54M  | ko02010 | 4        | 33            | 0.00145         | 0.06517                   | up      |
| Fatty acid elongation             | T54C vs 54M  | ko00062 | 5        | 41            | 0.00036         | 0.04808                   | up      |
| Fatty acid metabolism             | T54C vs 54M  | ko01212 | 12       | 127           | 0.00036         | 0.03038                   | down    |
|                                   | T54C vs T54S | ko01212 | 13       | 127           | 0.00015         | 0.00754                   | down    |
| Flavonoid biosynthesis            | T54C vs 54M  | ko00941 | 7        | 45            | 0.00045         | 0.03038                   | down    |
|                                   | T54C vs T54S | ko00941 | 8        | 45            | 0.00010         | 0.00680                   | down    |

|                                |         |         |   |     |         |         |    |
|--------------------------------|---------|---------|---|-----|---------|---------|----|
| <b>Polycyclic aromatic</b>     | T54C vs |         |   |     |         |         |    |
|                                |         | ko00624 | 8 | 110 | 0.00072 | 0.01574 | up |
| <b>hydrocarbon degradation</b> | T54S    |         |   |     |         |         |    |

**Table S3.** SNP distribution in genomic regions of the Ogura-CMS, DGMS and maintainer broccoli lines.

| Sample | Exonic | Splicing | 5'    | 3'     | Intronic | Upstream | Downstream | Intergenic |
|--------|--------|----------|-------|--------|----------|----------|------------|------------|
| Name   |        | Site     | UTR   | UTR    |          |          |            |            |
| T54C-1 | 52.66% | 0.40%    | 6.63% | 9.82%  | 7.60%    | 2.32%    | 3.71%      | 16.86%     |
| T54C-2 | 52.92% | 0.40%    | 6.60% | 9.61%  | 7.72%    | 2.25%    | 3.45%      | 17.05%     |
| T54M-1 | 53.29% | 0.40%    | 6.32% | 10.10% | 7.11%    | 2.24%    | 3.59%      | 16.95%     |
| T54M-2 | 51.41% | 0.35%    | 5.52% | 10.89% | 7.52%    | 2.44%    | 4.33%      | 17.55%     |
| T54S-1 | 53.57% | 0.40%    | 6.52% | 10.18% | 7.66%    | 2.12%    | 3.42%      | 16.13%     |
| T54S-2 | 55.21% | 0.41%    | 6.66% | 9.98%  | 7.01%    | 2.06%    | 3.10%      | 15.56%     |

Note: T54C, T54M and T54S represent the samples of the Ogura-CMS, DGMS and maintainer lines, respectively.
